# Supplementary material for: Evolution and expression of the phosphodiesterase 6 genes unveils vertebrate novelty to control photosensitivity
Source: PubMed Central journal article supplement (PMC4906994; doi:10.1186/s12862-016-0695-z), 2016-06-13
Supplement: 12862_2016_695_MOESM3_ESM.pdf [file 12862_2016_695_MOESM3_ESM.pdf]

## EVOLUTION AND EXPRESSION OF PHOSPHODIESTERASE 6 GENES SHOWS VERTEBRATE NOVELTY IN THE CONTROL OF PHOTSENSITIVITY

### *Supplementary figures and tables*

In this file all the supplementary figures are listed (S1-S18) as well as all the supplementary tables (S1-S3).

- **Figure S1:** Phylogenetic maximum likelihood tree with additional PDE6 catalytic subunit gene amino acid sequences from bird and non-avian reptile genomes. No *PDE6A* genes could be identified in any of the investigated species, further supporting the loss of *PDE6A* in this lineage.
- **Figure S2-S9:** Phylogenetic maximum likelihood trees of the investigated neighbouring gene families of the PDE6 catalytic subunit genes.
- **Figure S10-S17:** Synteny comparisons between spotted gar linkage groups carrying PDE6 inhibitory subunit genes and chromosomes and scaffolds in other species where comparisons with tables from Ocampo Daza et al., 2012 were uninformative.
- **Figure S18:** Whole mount *in situ* hybridisation with PDE6 inhibitory subunit gene expression during zebrafish development (1 dpf – 3 dpf).
- **Table S1:** List of the identified neighbouring gene families of the PDE6 catalytic subunit gene paralogon.
- **Table S2:** Table listing the pair-wise percentage nucleotide sequence identity between the PDE6 inhibitory subunit gene 3'UTR sequences.
- **Table S3:** Table displaying the results from one-way ANOVA of the relative expression for each PDE6 subunit gene between the six time-points

## S1 – PDE6 catalytic subunits family

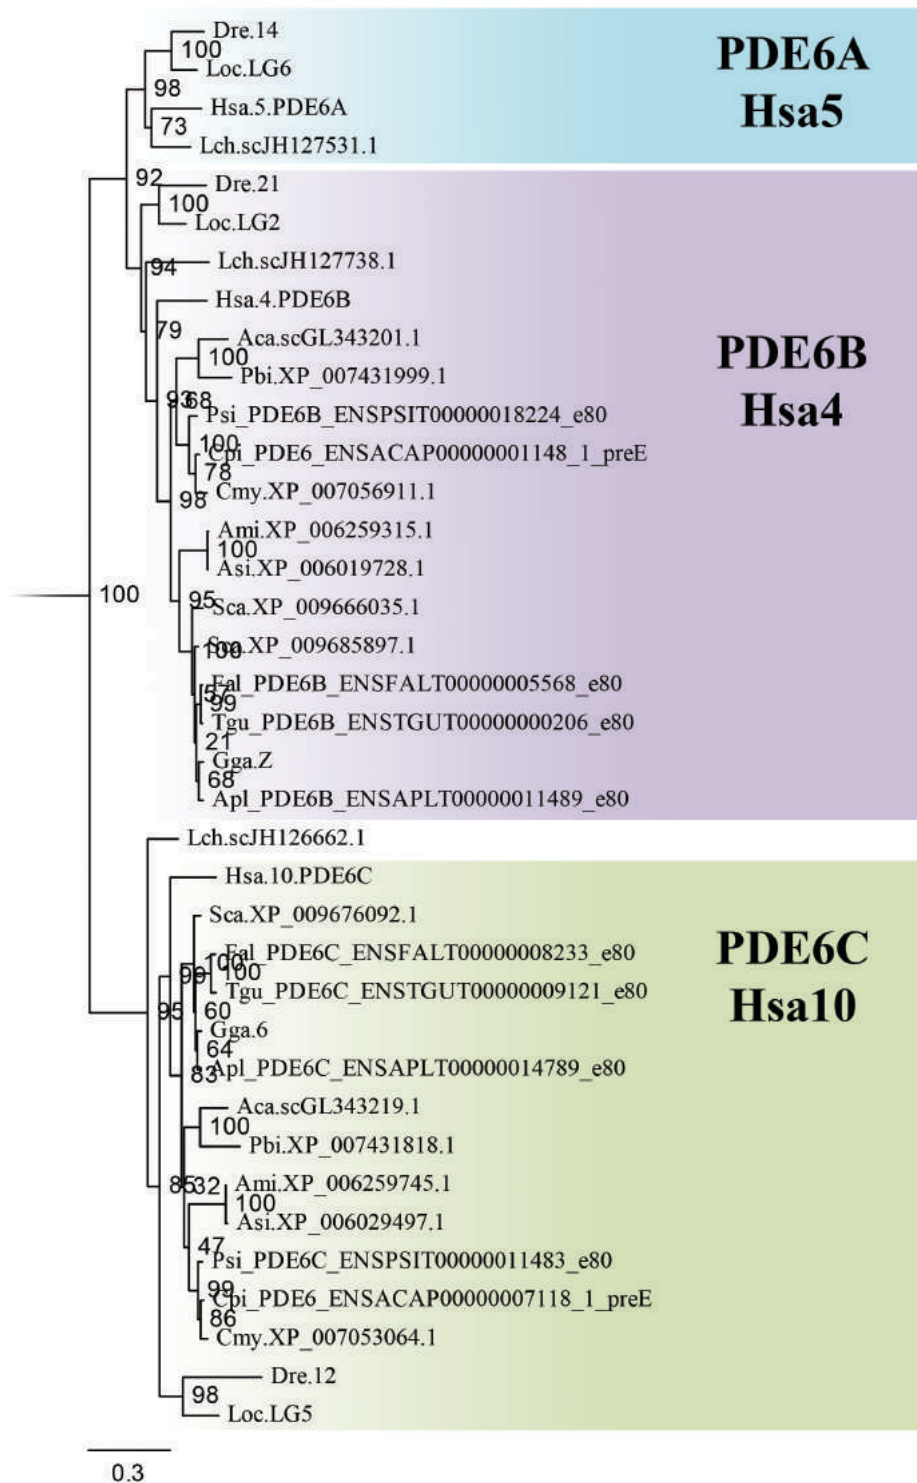

**Supplementary figure S1:** Phylogenetic maximum likelihood tree of the PDE6 protein family using 100 bootstrap and the WAG amino acid substitution model. The *PDE6B* and *PDE6C* but not *PDE6A* genes were identified in the investigated bird and non-avian reptile genomes. Species abbreviations are summarised in table 2, the number following the species abbreviation is either the chromosome or scaffold number or transcript id/accession number. The tree was rooted with the human PDE5A and PDE11A sequences (not shown).

## S2 – STK32

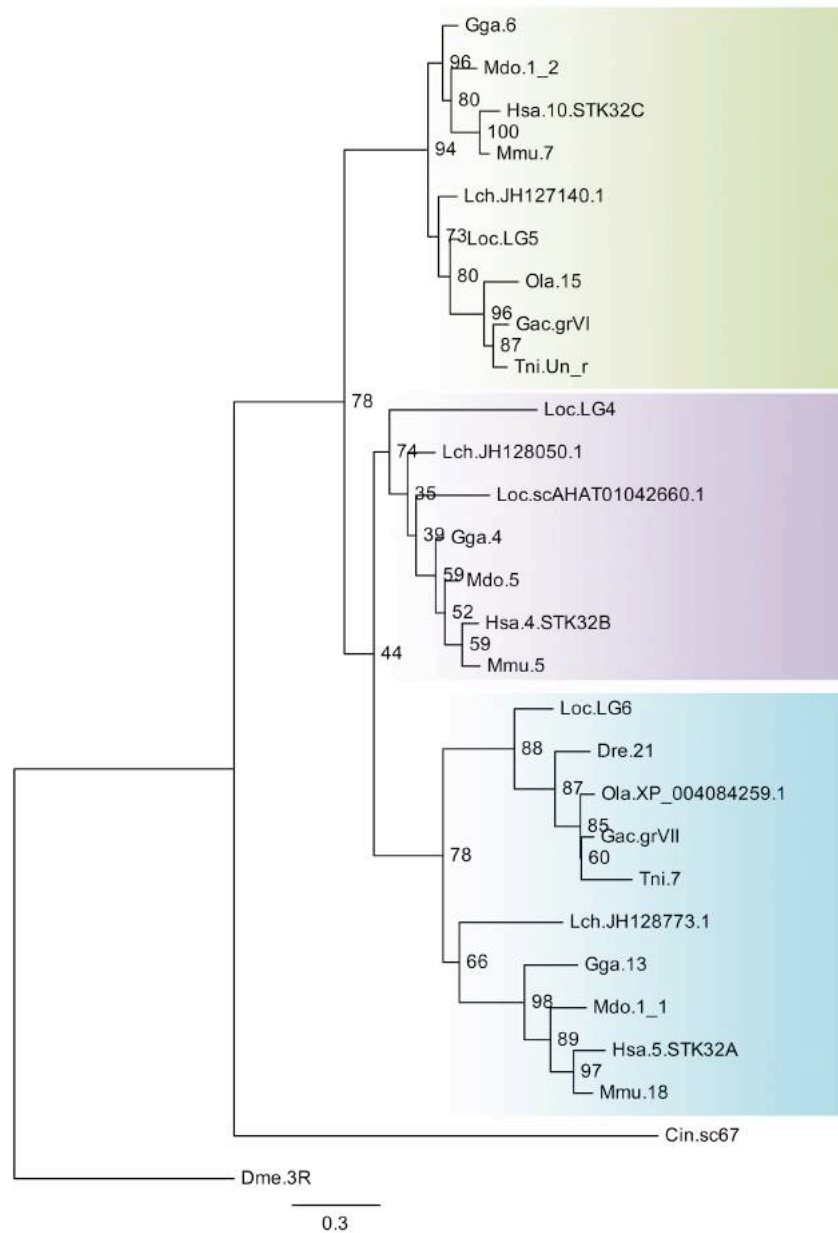

**Supplementary figure S2:** Phylogenetic maximum likelihood tree of the STK32 protein family using 100 bootstrap and the JTT amino acid substitution model. The tree was rooted with the fruitfly ortholog. The topology of the tree with three clusters is in line with an expansion in 2R. Teleost fish has lost the STK32B gene. Species abbreviations are summarised in table 2, the number following the species abbreviation is either the chromosome or scaffold number or transcript id/accession number.

## S3 – TBC1D

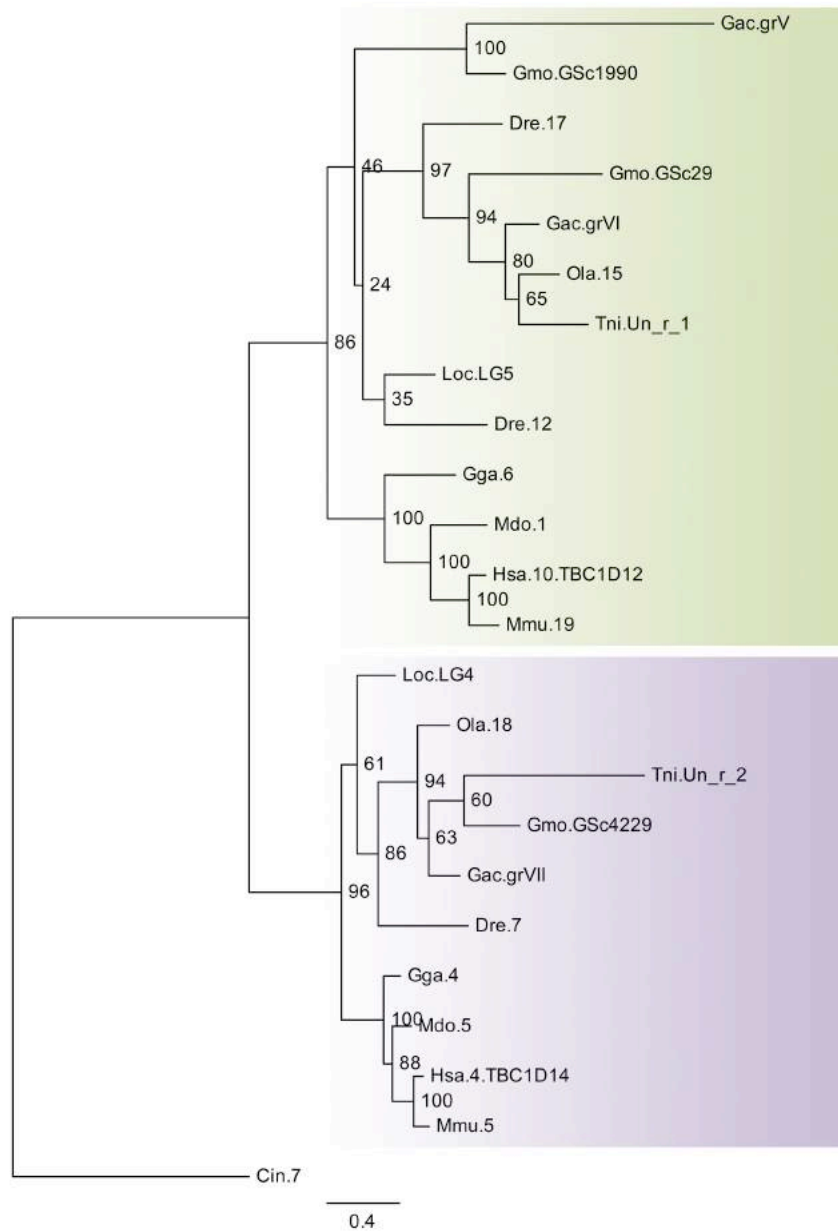

**Supplementary figure S3:** Phylogenetic maximum likelihood tree of the TBC1D protein family using 100 bootstrap and the JTT amino acid substitution model. The tree was rooted with the vase tunicate ortholog. The two vertebrate clusters in the tree are in line with an expansion in 2R, followed by losses. Species abbreviations are summarised in table 2, the number following the species abbreviation is either the chromosome or scaffold number or transcript id/accession number.

## S4 – PPP2R2

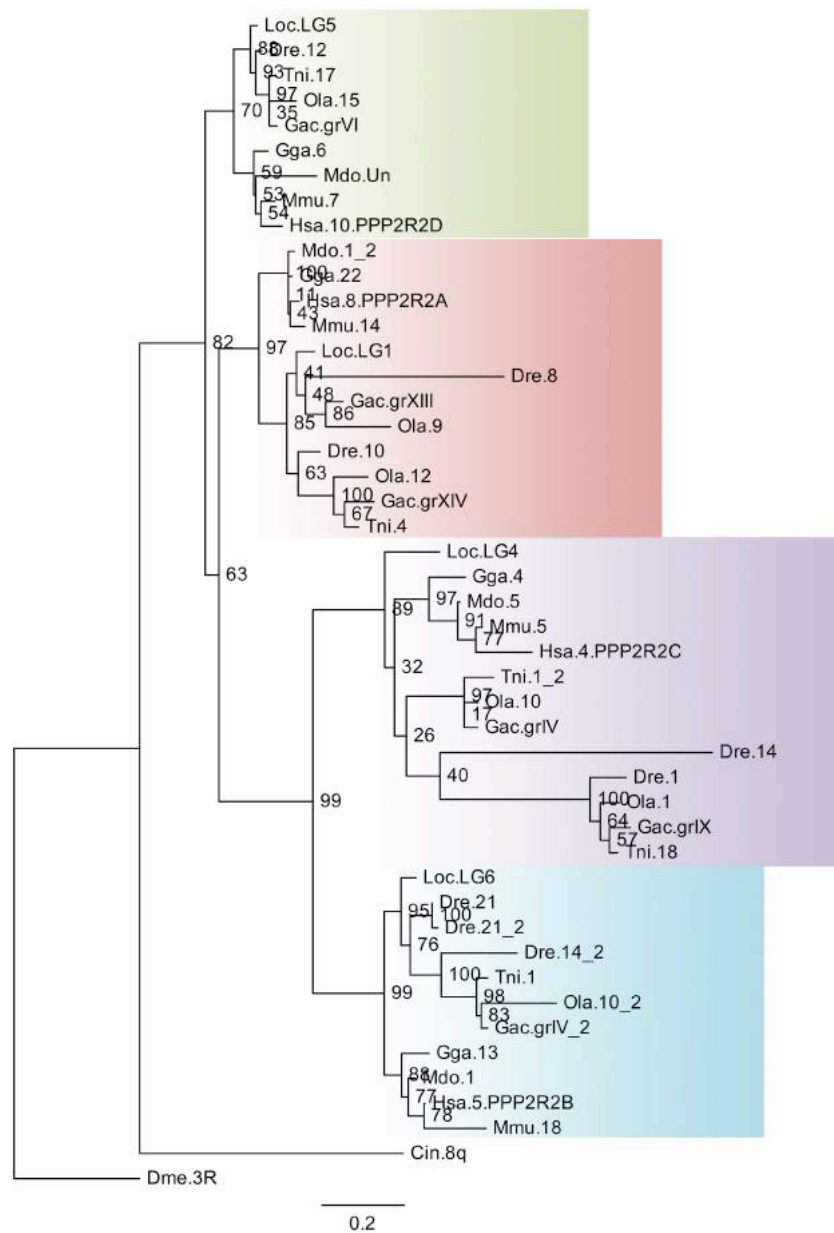

**Supplementary figure S4:** Phylogenetic maximum likelihood tree of the PPP2R2 protein family using 100 bootstrap and the JTT amino acid substitution model. The tree was rooted with the fruitfly ortholog. The topology, with four vertebrate clusters, is in line with an expansion in 2R. *PPP2R2A* and *PPP2R2C* probably duplicated further in 3R, although the support for *PPP2R2C* is weaker. Species abbreviations are summarised in table 2, the number following the species abbreviation is either the chromosome or scaffold number or transcript id/accession number.

## S5 – DPYS

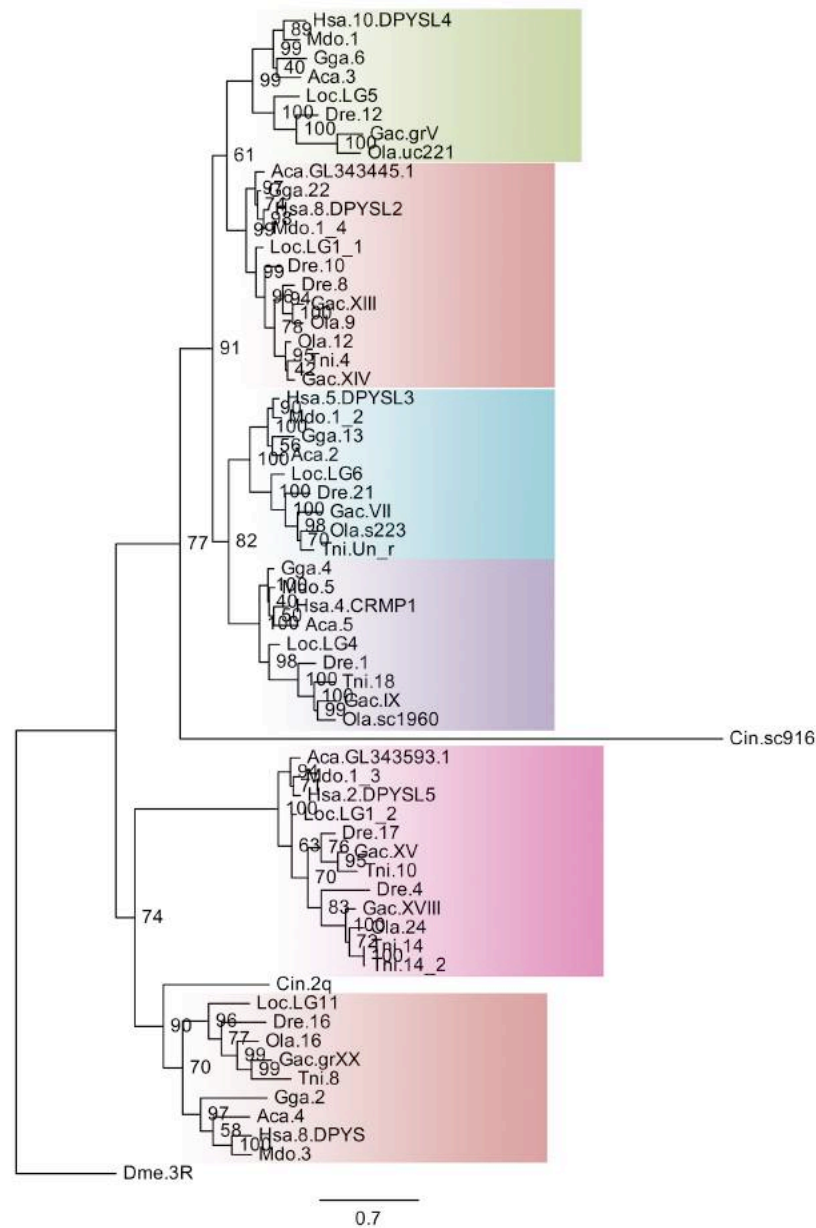

**Supplementary figure S5:** Phylogenetic maximum likelihood tree of the DPYS protein family using 100 bootstrap and the JTT amino acid substitution model. The tree was rooted with the fruitfly ortholog. The topology of the tree suggests a pre-vertebrate duplication followed by 2R expansion of one of the resulting genes. *DPYSL2* possibly duplicated further in 3R. Species abbreviations are summarised in table 2, the number following the species abbreviation is either the chromosome or scaffold number or transcript id/accession number.

## S6 – ABLIM

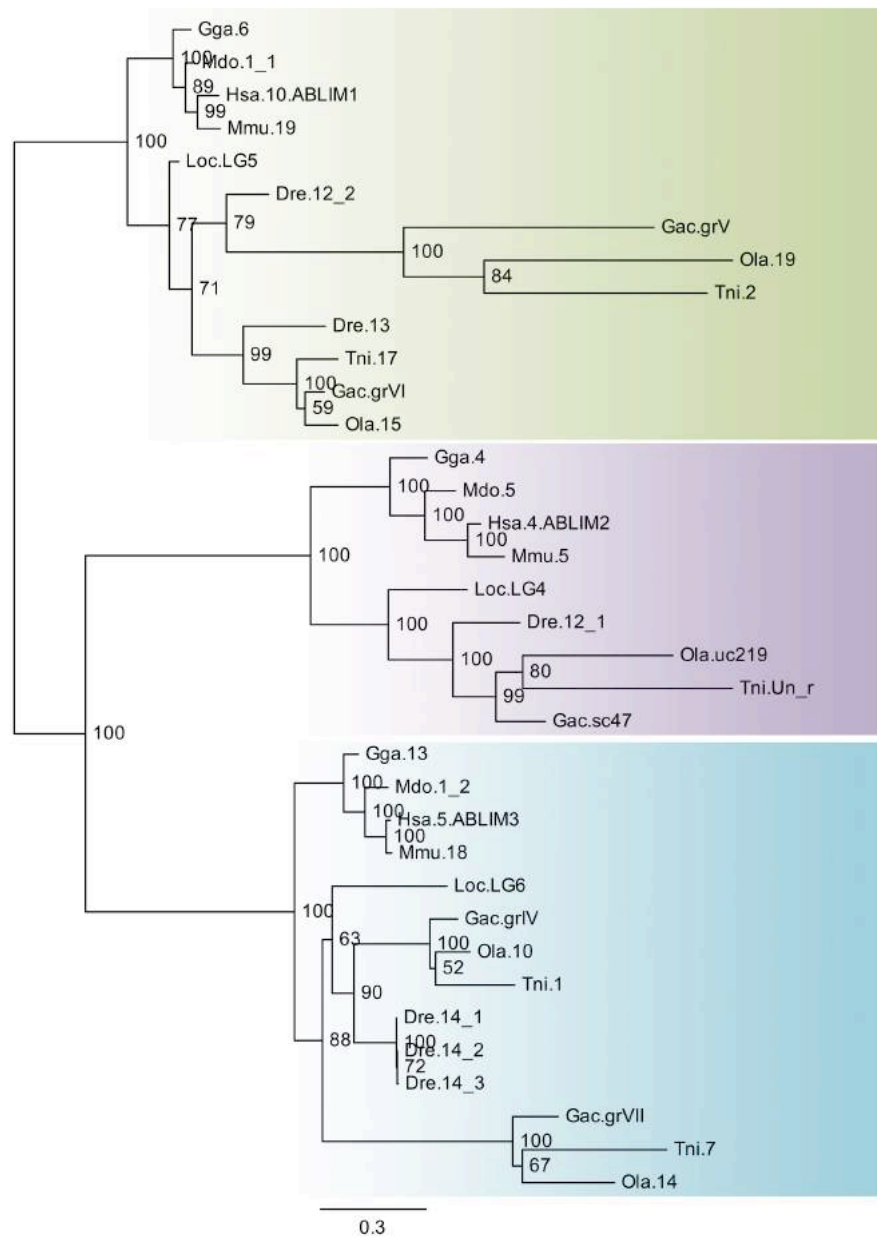

**Supplementary figure S6:** Phylogenetic maximum likelihood tree of the ABLIM protein family using 100 bootstrap and the JTT amino acid substitution model. The tree was midpoint-rooted. Due to the lack of invertebrate sequences for relative dating, it is not possible to say when the duplications that resulted in the three vertebrate clusters occurred. However, the presence of three clusters is possible if the family duplicated in 2R. *ABLIM1* and *ABLIM3* duplicated further in 3R. Species abbreviations are summarised in table 2, the number following the species abbreviation is either the chromosome or scaffold number or transcript id/accession number.

## S7 – AFAP

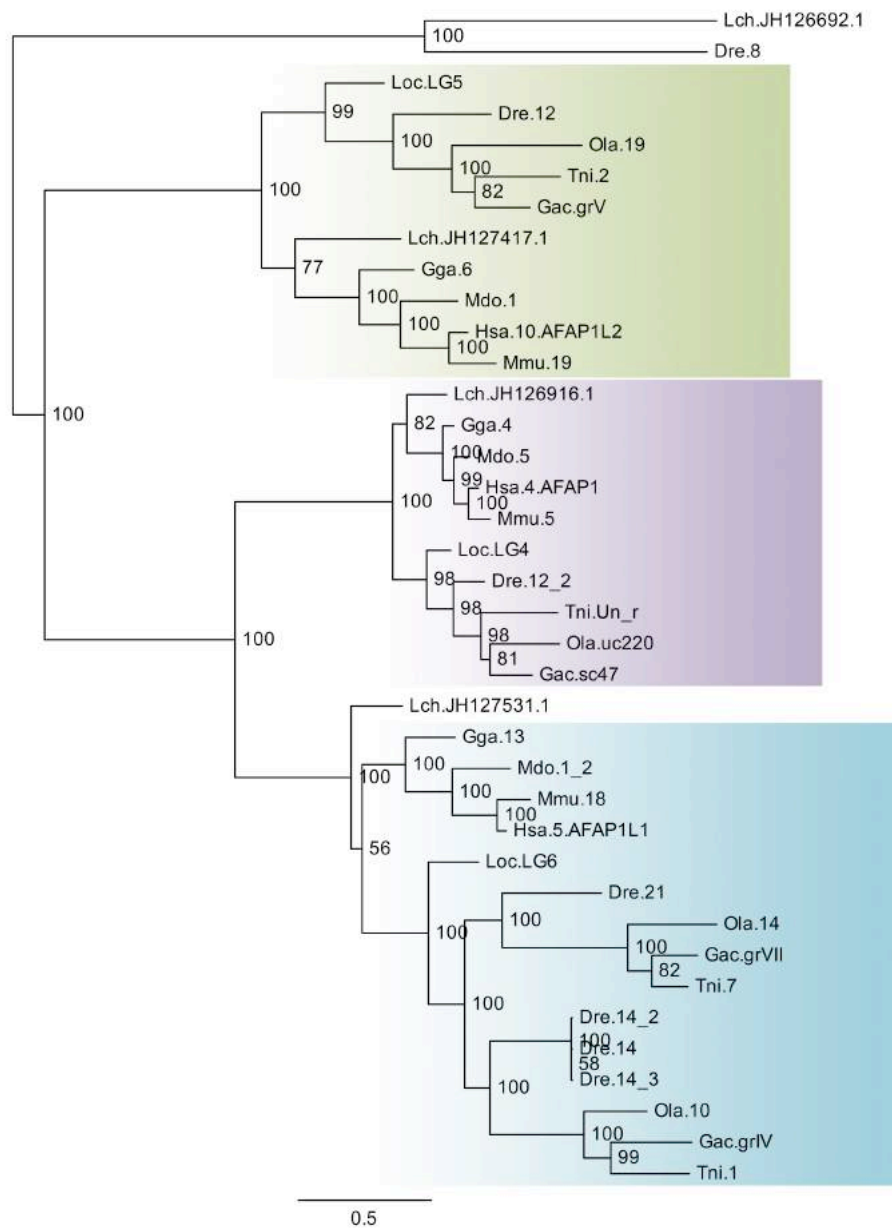

**Supplementary figure S7:** Phylogenetic maximum likelihood tree of the AFAP protein family using 100 bootstrap and the JTT amino acid substitution model. The tree was midpoint-rooted. Due to the lack of invertebrate sequences for relative dating, it is not possible to say when the duplications that resulted in the three vertebrate clusters occurred. However, the presence of three clusters is possible if the family duplicated in 2R. *AFAP1L1* duplicated further in 3R. Species abbreviations are summarised in table 2, the number following the species abbreviation is either the chromosome or scaffold number or transcript id/accession number.



## S8 – JAKMIP

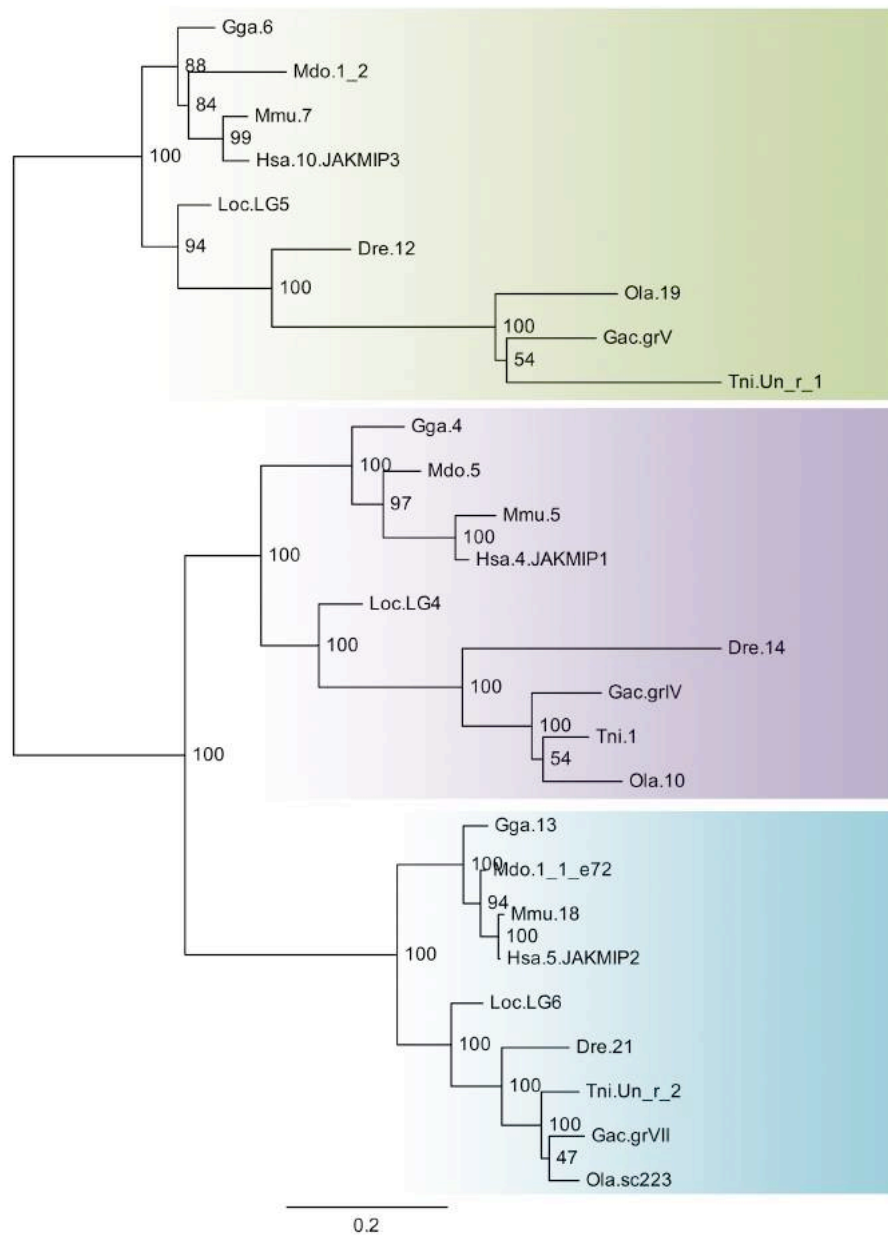

**Supplementary figure S8:** Phylogenetic maximum likelihood tree of the JAKMIP protein family using 100 bootstrap and the JTT amino acid substitution model. The tree was midpoint-rooted. Due to the lack of invertebrate sequences for relative dating, it is not possible to say when the duplications that resulted in the three vertebrate clusters occurred. However, the presence of three clusters is possible if the family duplicated in 2R. Species abbreviations are summarised in table 2, the number following the species abbreviation is either the chromosome or scaffold number or transcript id/accession number.

## S9 – SH3TC

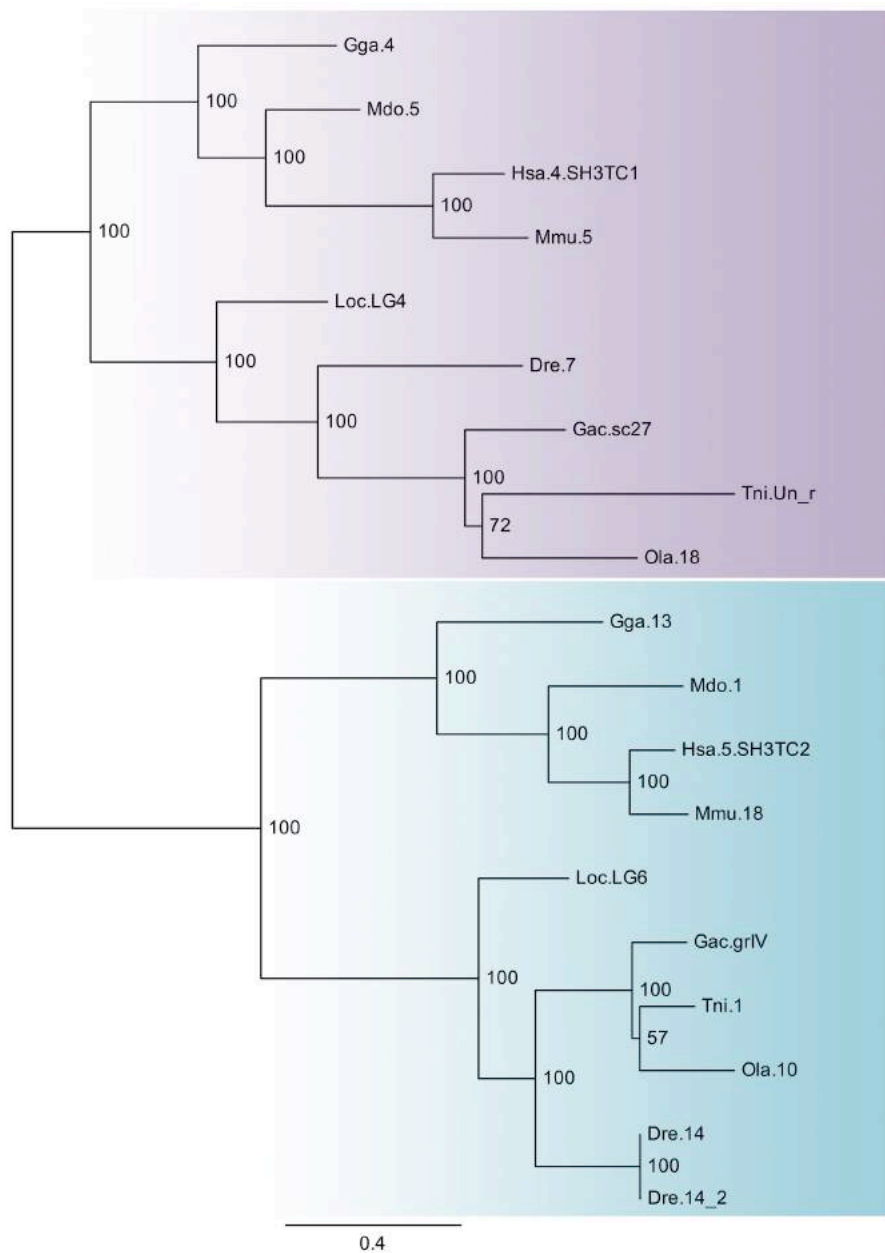

**Supplementary figure S9:** Phylogenetic maximum likelihood tree of the SH3TC protein family using 100 bootstrap and the JTT amino acid substitution model. The tree was midpoint-rooted. Due to the lack of invertebrate sequences for relative dating it is not possible to say when the duplications that resulted in the two vertebrate clusters occurred. However, the presence of two clusters is possible if the family duplicated in 2R. Species abbreviations are summarised in table 2, the number following the species abbreviation is either the chromosome or scaffold number or transcript id/accession number.

# S10

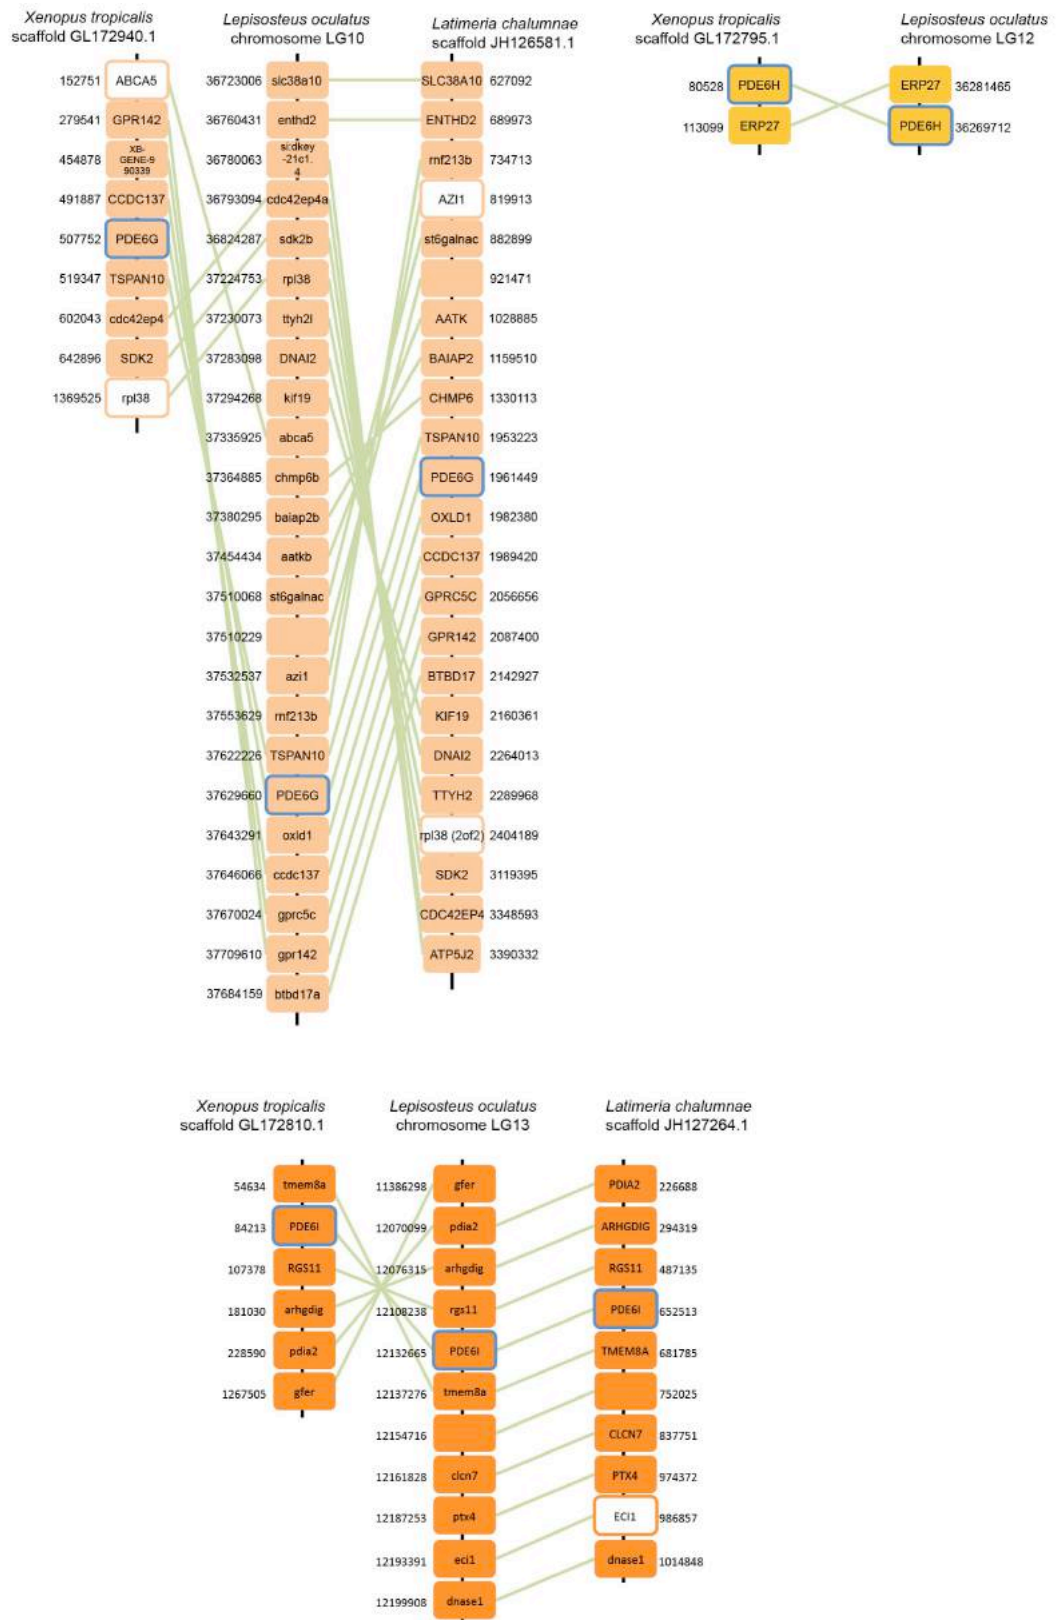

**Supplementary figure S10:** Genes present within 1 Mb up and downstream of spotted gar PDE6 inhibitory subunit genes with orthologs on a PDE6 inhibitory subunit gene carrying scaffold in Western clawed frog and coelacanth. Boxes are coloured based on the Ensembl orthology confidence where solid boxes are 1 and white boxes are 0.

# S11

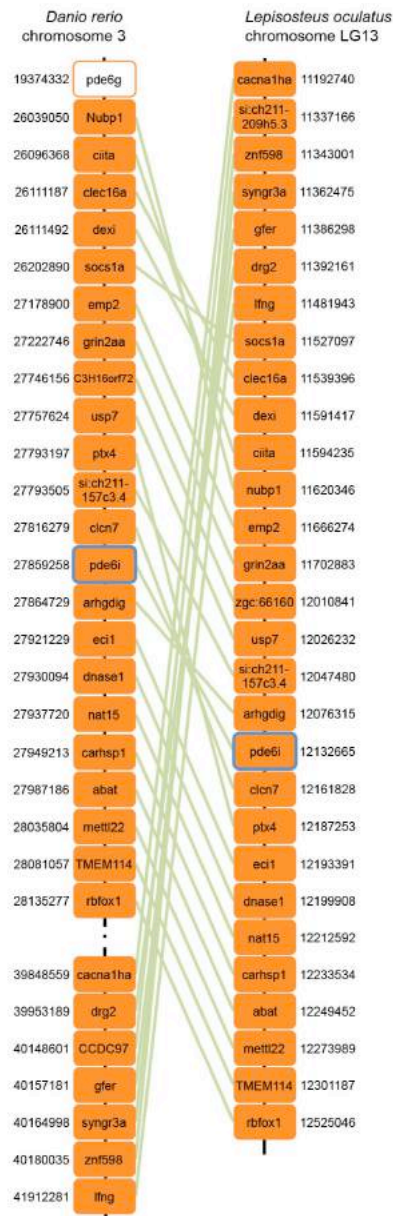

**Supplementary figure S11:** Genes present within 1 Mb up and downstream of spotted gar PDE6 inhibitory subunit genes with orthologs on a PDE6 inhibitory subunit gene carrying chromosome in zebrafish. Boxes are coloured based on the Ensembl orthology confidence where solid boxes are 1 and white boxes are 0.

# S12

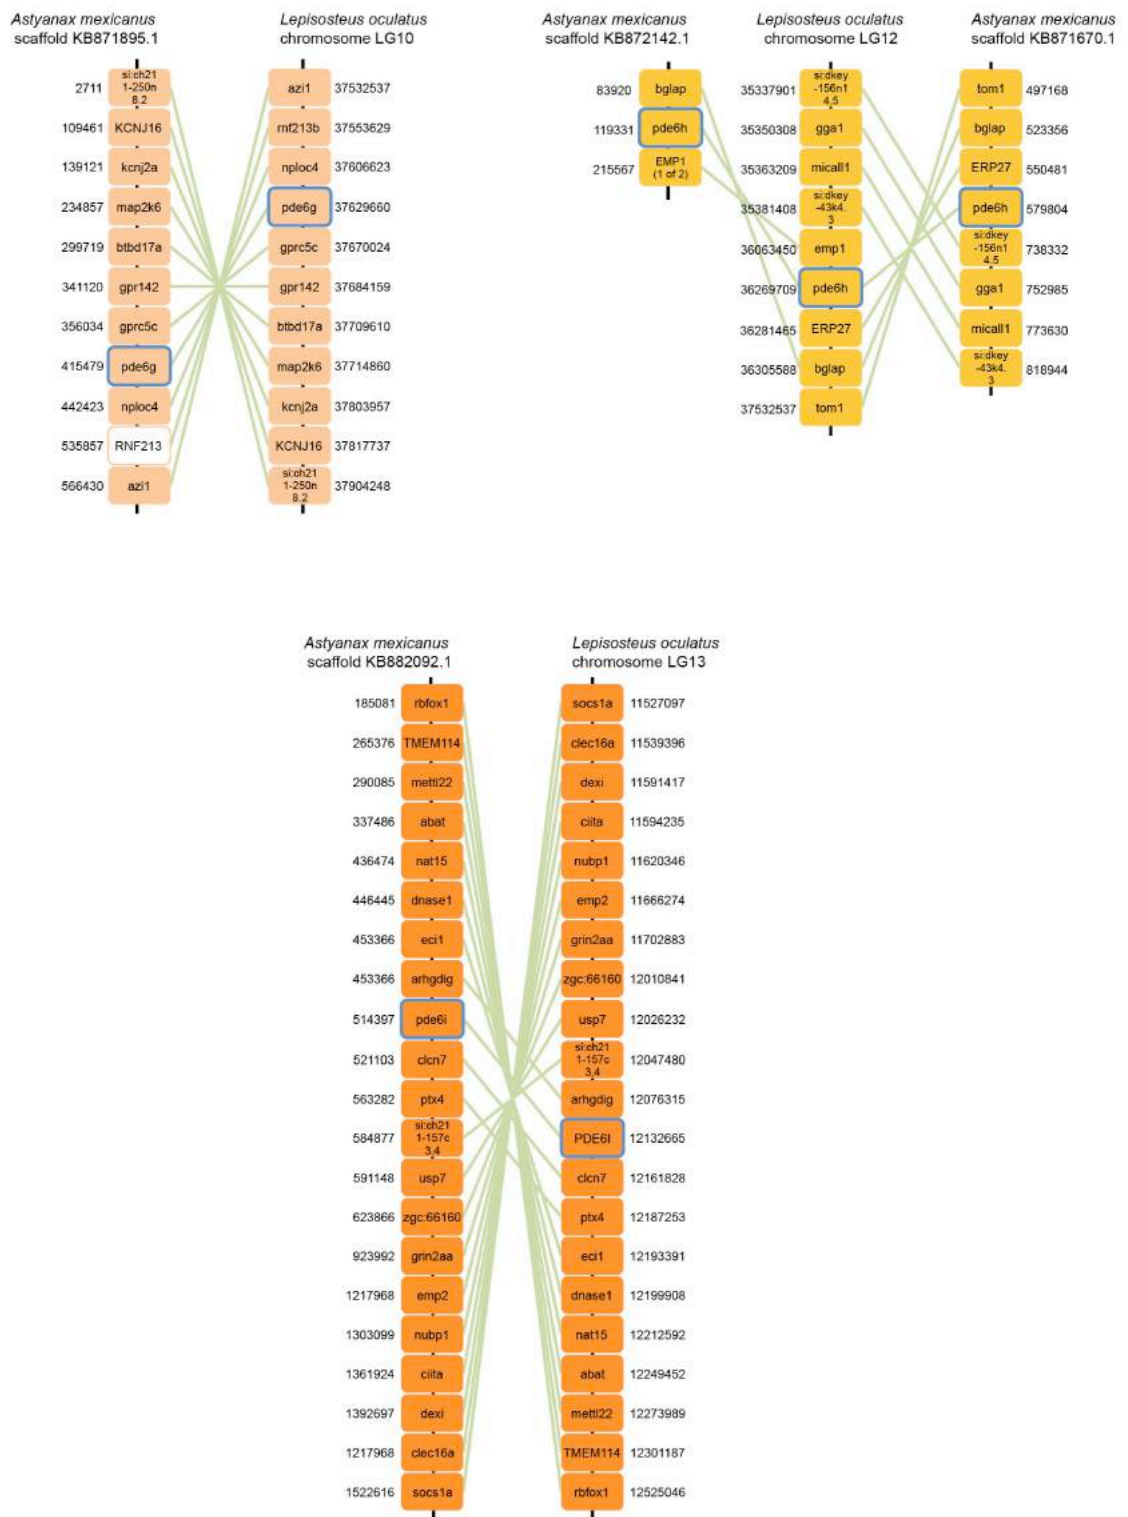

**Supplementary figure S12:** Genes present within 1 Mb up and downstream of spotted gar PDE6 inhibitory subunit genes with orthologs on a PDE6 inhibitory subunit gene carrying scaffold in Mexican cave tetra. Boxes are coloured based on the Ensembl orthology confidence where solid boxes are 1 and white boxes are 0.

# S13

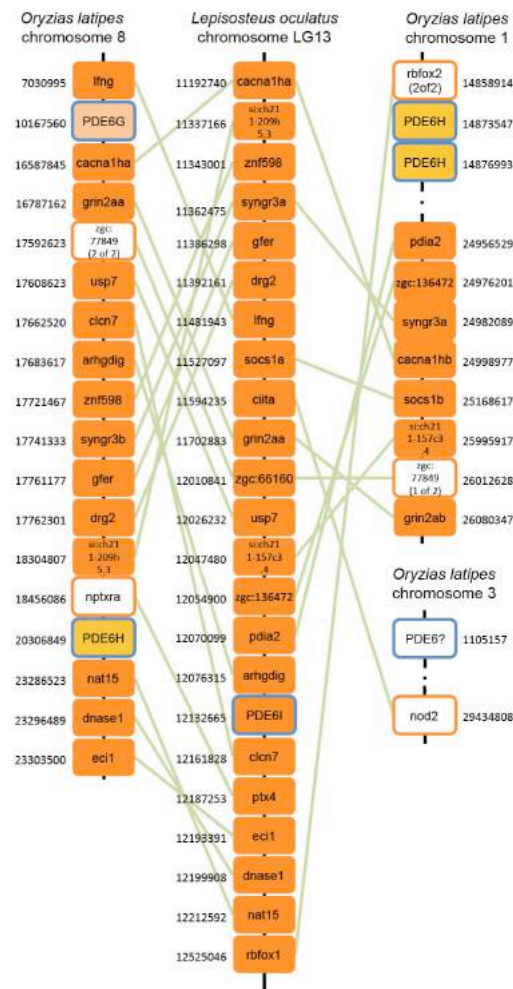

**Supplementary figure S13:** Genes present within 1 Mb up and downstream of spotted gar PDE6 inhibitory subunit genes with orthologs on a PDE6 inhibitory subunit gene carrying chromosome in Medaka. Boxes are coloured based on the Ensembl orthology confidence where solid boxes are 1 and white boxes are 0.

# S14

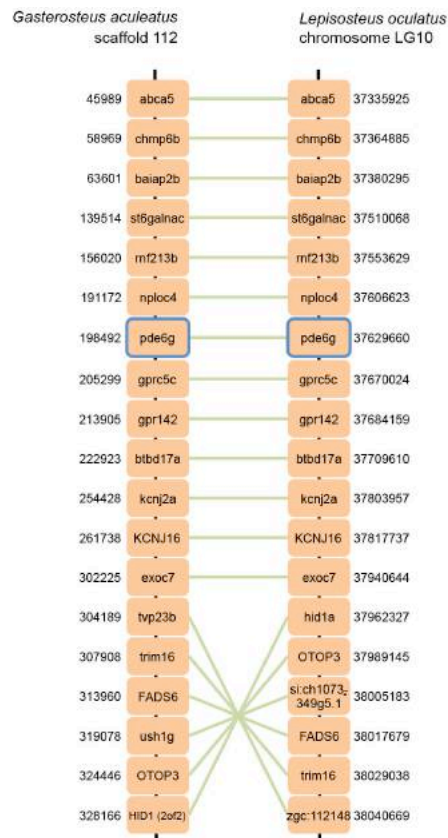

**Supplementary figure S14:** Genes present within 1 Mb up and downstream of spotted gar PDE6 inhibitory subunit genes with orthologs on a PDE6 inhibitory subunit gene carrying scaffold in three-spined stickleback. Boxes are coloured based on the Ensembl orthology confidence where solid boxes are 1 and white boxes are 0.

# S15

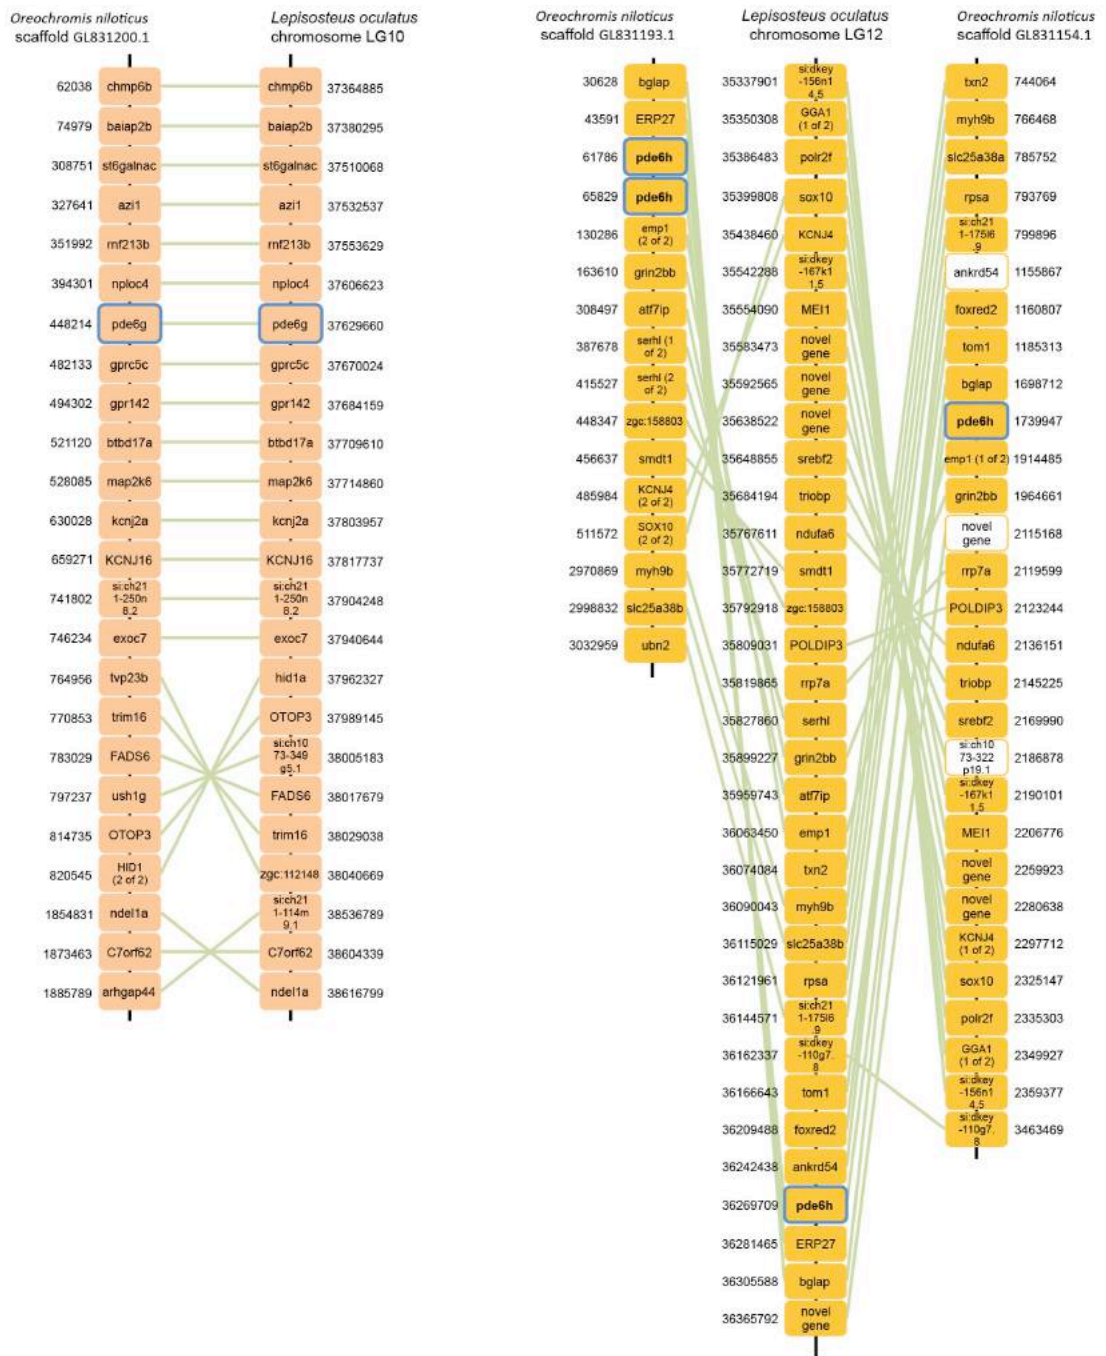

**Supplementary figure S15:** Genes present within 1 Mb up and downstream of spotted gar PDE6 inhibitory subunit genes with orthologs on a PDE6 inhibitory subunit gene carrying scaffold in Nile tilapia. Boxes are coloured based on the Ensembl orthology confidence where solid boxes are 1 and white boxes are 0.



# S16

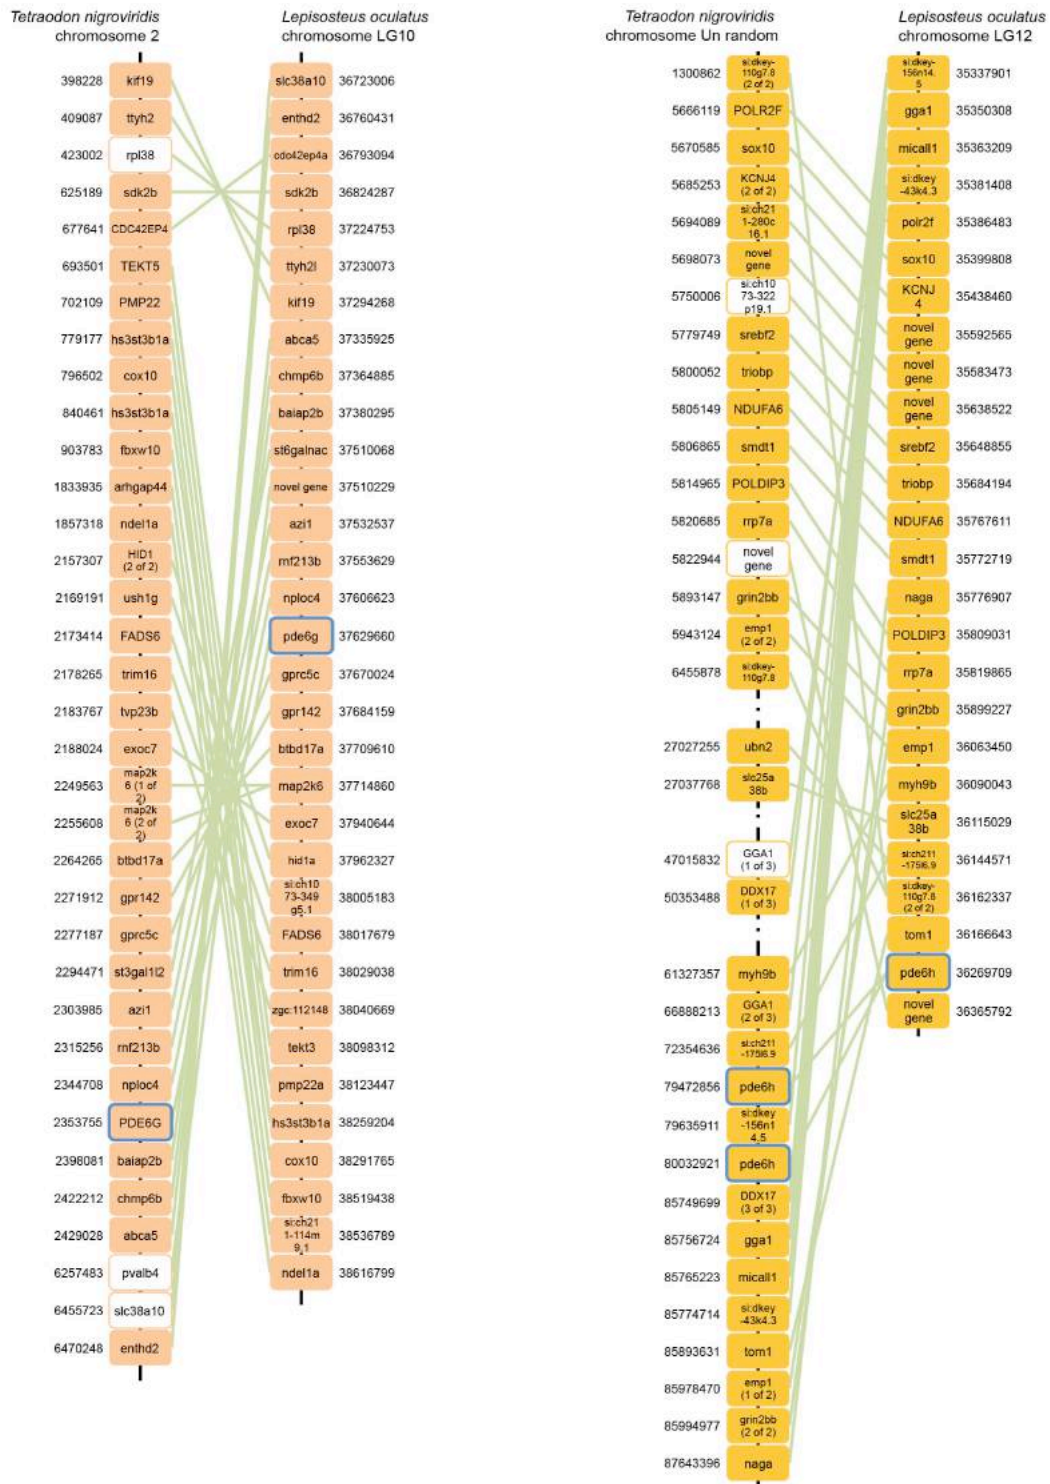

**Supplementary figure S16:** Genes present within 1 Mb up and downstream of spotted gar PDE6 inhibitory subunit genes with orthologs on a PDE6 inhibitory subunit gene carrying chromosome in green spotted pufferfish. Boxes are coloured based on the Ensembl orthology confidence where solid boxes are 1 and white boxes are 0.

# S17

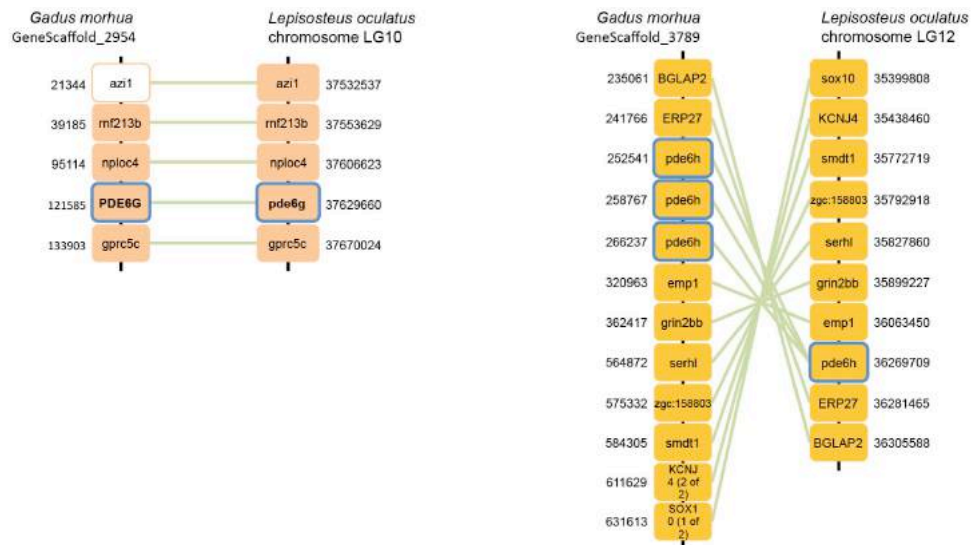

**Supplementary figure S17:** Genes present within 1 Mb up and downstream of spotted gar PDE6 inhibitory subunit genes with orthologs on a PDE6 inhibitory subunit gene carrying scaffold in Atlantic cod. Boxes are coloured based on the Ensembl orthology confidence where solid boxes are 1 and white boxes are 0.

S18

1 dpf

2 dpf

3 dpf

*pde6ga*

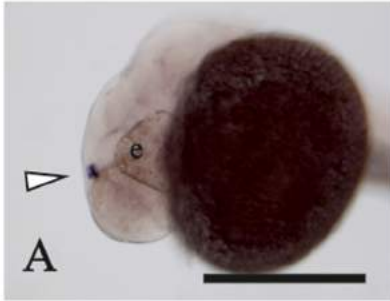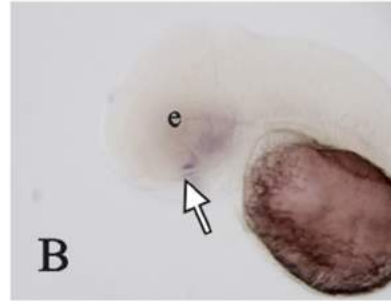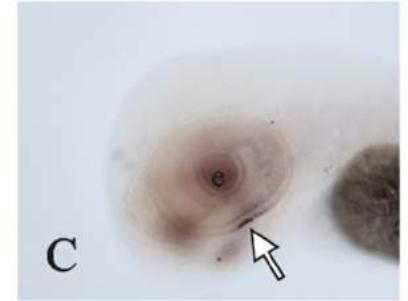

*pde6gb*

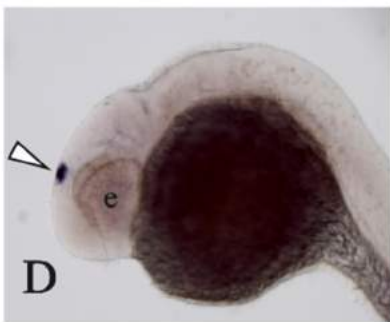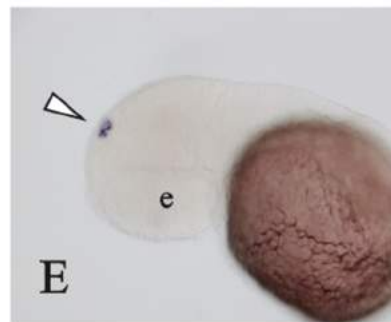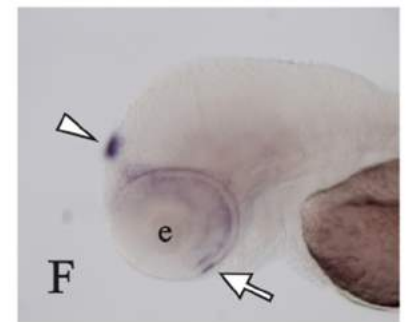

*pde6ha*

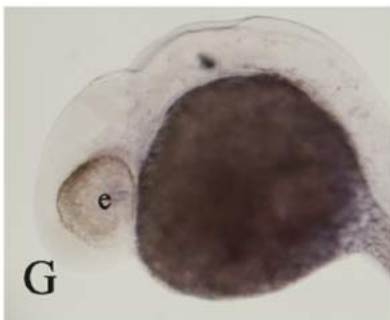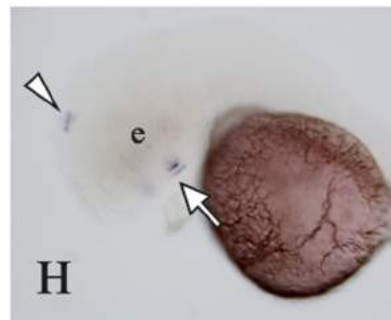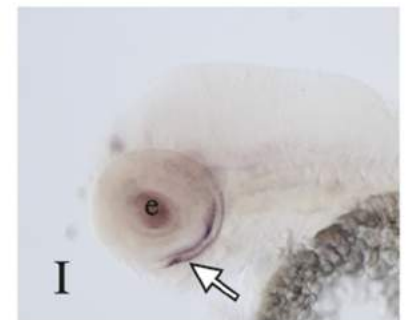

*pde6hb*

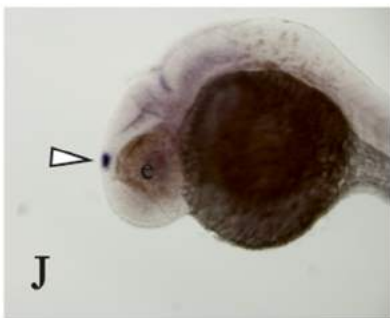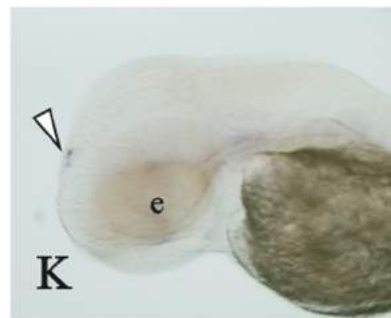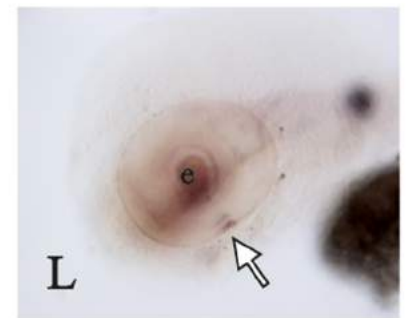

**Supplementary figure S1: Onset of the PDE6 inhibitory subunit genes expression during zebrafish development.** Photomicrographs of WISH experiments on 1-3 dpf AB zebrafish embryos showing staining for *pde6ga*, *pde6gb*, *pde6ha* and *pde6hb* genes. Staining in the pineal complex (arrowheads) could be first observed at 1 dpf for *pde6ga* (A), *pde6gb* (D) and *pde6hb* (J) while at 2 dpf for *pde6ha* (H). This expression is not transient, hence can be observed also in adults (see figure 3). The expression in the retina starts in the ventral side (arrows) and is delayed until around 2 dpf. For *pde6ga* (B) and *pde6ha* (H), the first stained cells can be observed at 2 dpf (48 hpf exactly), while the staining for *pde6ga* and *pde6hb* is not observed at 2 dpf (E, K) but is almost in the entire retina at 3 dpf (F, L). This suggests, as is the case for *transducins* (Lagman et al. 2015), an unsynchronised onset, between 48 and 52 hpf. Rostral is to the left, “e” indicates the eyes. Scale bars: 50  $\mu$ m.

**Table S1. Identified neighbouring gene families in the chromosomal regions housing the PDE6 catalytic subunit genes.**

| Symbol | Description                                                                                                                                                                                                                          | Comments                                                                                    | Ensembl. Family ID  | Outgroup used as root <sup>1</sup> |
|--------|--------------------------------------------------------------------------------------------------------------------------------------------------------------------------------------------------------------------------------------|---------------------------------------------------------------------------------------------|---------------------|------------------------------------|
| ABLIM  | <i>ACTIN BINDING LIM</i><br><i>ABLIM ACTIN BINDING</i><br><i>LIM FAMILY MEMBER</i>                                                                                                                                                   |                                                                                             | ENSMF0025000000459  |                                    |
| AFAP   | <i>ACTIN FILAMENT</i><br><i>ASSOCIATED 1 1 AFAP1 1</i>                                                                                                                                                                               |                                                                                             | ENSMF00570000851128 |                                    |
| CP     | <i>CARBOXYPEPTIDASE</i>                                                                                                                                                                                                              | Removed from analysis due to complex topology                                               | ENSMF0025000000555  |                                    |
| DPYS   | <i>DIHYDROPYRIMIDINASE</i><br><i>RELATED DRP</i><br><i>COLLAPSIN RESPONSE</i><br><i>MEDIATOR CRMP</i>                                                                                                                                | Mouse sequences were left out of the analysis due to the multitude of members in the family | ENSMF0025000000643  | <i>Dme</i>                         |
| JAKMIP | <i>JANUS KINASE AND</i><br><i>MICROTUBULE</i><br><i>INTERACTING 1</i><br><i>MULTIPLE ALPHA</i><br><i>HELICES AND RNA</i><br><i>LINKER 1 MARLIN 1</i><br><i>SERINE/THREONINE</i><br><i>PHOSPHATASE 2A 55</i><br><i>KDA REGULATORY</i> |                                                                                             | ENSMF0025000001480  |                                    |
| PPP2R2 | <i>SUBUNIT B PP2A</i><br><i>SUBUNIT B B55 PP2A</i><br><i>SUBUNIT B PR55 PP2A</i><br><i>SUBUNIT B R2 PP2A</i><br><i>SUBUNIT B</i>                                                                                                     |                                                                                             | ENSMF0025000000829  | <i>Dme</i>                         |
| SH3TC  | <i>SH3 DOMAIN AND</i><br><i>TETRATRICOPEPTIDE</i><br><i>REPEAT CONTAINING</i>                                                                                                                                                        |                                                                                             | ENSMF0025000003090  |                                    |
| SLC26A | <i>SOLUTE CARRIER</i><br><i>FAMILY 26 MEMBER</i>                                                                                                                                                                                     | Removed from analysis due to complex topology                                               | ENSMF0025000000278  |                                    |
| STK32  | <i>SERINE/THREONINE</i><br><i>KINASE EC_2.7.11.1</i>                                                                                                                                                                                 |                                                                                             | ENSMF00260000050596 | <i>Dme</i>                         |
| TBC1D  | <i>TBC1 DOMAIN FAMILY</i><br><i>MEMBER</i>                                                                                                                                                                                           |                                                                                             | ENSMF00250000002496 | <i>Cin</i>                         |
| ZNF    | <i>ZINC FINGER</i>                                                                                                                                                                                                                   | Removed from analysis due to complex topology                                               | ENSMF0025000000002  |                                    |

<sup>1</sup>The Ensembl protein families that lack invertebrate family members were left unrooted in the phylogenetic analyses and visualized as midpoint-rooted in supplementary figs. S2-S9.

**Table S1:** The table lists the identified neighbouring gene families with members in at least two of three regions spanning approximately 10 mega base pairs up stream and downstream of the human PDE6 catalytic subunit genes.

**Table S2: Percentage identity between zebrafish PDE6 inhibitory subunit gene 3'UTR sequences**

| Gene          | <i>pde6ga</i> | <i>pde6gb</i> | <i>pde6ha</i> | <i>pde6hb</i> | <i>pde6i</i> |
|---------------|---------------|---------------|---------------|---------------|--------------|
| <i>pde6ga</i> | -             | 47.74         | 41.16         | 43.86         | 51.72        |
| <i>pde6gb</i> |               | -             | 53.19         | 48.18         | 47.85        |
| <i>pde6ha</i> |               |               | -             | 58.91         | 51.60        |
| <i>pde6hb</i> |               |               |               | -             | 47.58        |
| <i>pde6i</i>  |               |               |               |               | -            |

**Table S2:** Nucleotide sequence identity from pair-wise sequence alignments between the zebrafish PDE6 inhibitory subunit 3'UTR sequences. The alignments were done in JalView 2.7.

**Table S3. Results from one-way ANOVA of the relative expression for each PDE6 subunit gene between at six time-points during 24 hours**

| <i>pde6a</i> |       |       |       |       |       |       |
|--------------|-------|-------|-------|-------|-------|-------|
| Time         | 08:00 | 12:00 | 17:00 | 20:00 | 24:00 | 04:00 |
| 08:00        | -     | ns    | ns    | ns    | ns    | ns    |
| 12:00        |       | -     | ns    | ns    | ns    | ns    |
| 17:00        |       |       | -     | ns    | ns    | ns    |
| 20:00        |       |       |       | -     | *     | ns    |
| 24:00        |       |       |       |       | -     | *     |
| 04:00        |       |       |       |       |       | -     |

  

| <i>pde6b</i> |       |       |       |       |       |       |
|--------------|-------|-------|-------|-------|-------|-------|
| Time         | 08:00 | 12:00 | 17:00 | 20:00 | 24:00 | 04:00 |
| 08:00        | -     | ns    | ns    | ns    | ns    | *     |
| 12:00        |       | -     | ns    | ns    | ns    | ns    |
| 17:00        |       |       | -     | ns    | ns    | ns    |
| 20:00        |       |       |       | -     | ns    | ns    |
| 24:00        |       |       |       |       | -     | ns    |
| 04:00        |       |       |       |       |       | -     |

  

| <i>pde6c</i> |       |       |       |       |       |       |
|--------------|-------|-------|-------|-------|-------|-------|
| Time         | 08:00 | 12:00 | 17:00 | 20:00 | 24:00 | 04:00 |
| 08:00        | -     | *     | ***   | ***   | **    | **    |
| 12:00        |       | -     | ns    | ns    | ns    | ns    |
| 17:00        |       |       | -     | ns    | ns    | ns    |
| 20:00        |       |       |       | -     | ns    | ns    |
| 24:00        |       |       |       |       | -     | ns    |
| 04:00        |       |       |       |       |       | -     |

  

| <i>pde6ga</i> |       |       |       |       |       |       |
|---------------|-------|-------|-------|-------|-------|-------|
| Time          | 08:00 | 12:00 | 17:00 | 20:00 | 24:00 | 04:00 |
| 08:00         | -     | ***   | ***   | ***   | ***   | **    |
| 12:00         |       | -     | ns    | ns    | ns    | ***   |
| 17:00         |       |       | -     | ns    | ns    | ***   |
| 20:00         |       |       |       | -     | ns    | ***   |
| 24:00         |       |       |       |       | -     | *     |
| 04:00         |       |       |       |       |       | -     |

  

| <i>pde6gb</i> |       |       |       |       |       |       |
|---------------|-------|-------|-------|-------|-------|-------|
| Time          | 08:00 | 12:00 | 17:00 | 20:00 | 24:00 | 04:00 |
| 08:00         | -     | ns    | ns    | ns    | ns    | ns    |
| 12:00         |       | -     | ns    | ns    | *     | ns    |
| 17:00         |       |       | -     | ns    | ns    | ns    |
| 20:00         |       |       |       | -     | *     | ns    |
| 24:00         |       |       |       |       | -     | ns    |
| 04:00         |       |       |       |       |       | -     |

  

| <i>pde6ha</i> |       |       |       |       |       |       |
|---------------|-------|-------|-------|-------|-------|-------|
| Time          | 08:00 | 12:00 | 17:00 | 20:00 | 24:00 | 04:00 |
| 08:00         | -     | ns    | ns    | ns    | *     | **    |
| 12:00         |       | -     | ns    | *     | **    | ***   |
| 17:00         |       |       | -     | *     | **    | ***   |
| 20:00         |       |       |       | -     | ns    | ns    |
| 24:00         |       |       |       |       | -     | ns    |
| 04:00         |       |       |       |       |       | -     |

| <i>pde6hb</i> |       |       |       |       |       |       |
|---------------|-------|-------|-------|-------|-------|-------|
| Time          | 08:00 | 12:00 | 17:00 | 20:00 | 24:00 | 04:00 |
| 08:00         | -     | *     | ns    | ***   | ***   | ns    |
| 12:00         |       | -     | ns    | ns    | ns    | ns    |
| 17:00         |       |       | -     | **    | *     | ns    |
| 20:00         |       |       |       | -     | ns    | **    |
| 24:00         |       |       |       |       | -     | *     |
| 04:00         |       |       |       |       |       | -     |

**Table S3:** One-Way ANOVA with Tukey's Multiple Comparison post-hoc test results for the expression levels relative to the geometric mean of *actb1* and *tuba1b* of the different PDE6 subunit genes, both catalytic and inhibitory. The statistics were done in GraphPad Prism 5.00. Ns: non-significant difference.
